# Supplementary material for: Sex Differences in the Hepatic Cholesterol Sensing Mechanisms in Mice
Source: PubMed Central journal article supplement (PMC6270450; doi:10.3390/molecules180911067), 2013-09-10

## Supplementary Materials

**Table S1.** Primer information with gene/enzyme descriptions and determined efficiencies. Fw–forward, Rv–reverse.

| Gene symbol                               | Gene/enzyme description                                                                                   | NCBI accession no. | Primer sequence                                          | Efficiency |
|-------------------------------------------|-----------------------------------------------------------------------------------------------------------|--------------------|----------------------------------------------------------|------------|
| <b><i>Cholesterol synthesis genes</i></b> |                                                                                                           |                    |                                                          |            |
| <i>Hmgcs1</i>                             | 3-hydroxy-3-methylglutaryl-Coenzyme A synthase 1                                                          | NM_145942.4        | Fw: GCCGTGAACTGGGTCGAA<br>Rv: GCATATATAGCAATGTCTCCTGCAA  | 1.88       |
| <i>Hmgcr</i>                              | 3-hydroxy-3-methylglutaryl-Coenzyme A reductase                                                           | NM_008255.2        | Fw: CTTGTGGAATGCCTTGTGATTG<br>Rv: AGCCGAAGCAGCACATGAT    | 1.83       |
| <i>Fdft1</i>                              | farnesyl diphosphate farnesyl transferase 1                                                               | NM_010191.2        | Fw: CCAAACAGGACTGGGACAAG<br>Rv: GACGAGAAAGGCCAATTCC      | 1.90       |
| <i>Sqle</i>                               | squalene epoxidase/monooxygenase                                                                          | NM_009270.3        | Fw: TCAACCCCAGTCCAGTTCTC<br>Rv: GACTCCTTCAGGTGCTCAGG     | 1.77       |
| <i>Lss</i>                                | lanosterol synthase                                                                                       | NM_146006.1        | Fw: GGCACCAATGGATCACAGAT<br>Rv: AAACCTCAGGTCTGTGGTGTGC   | 1.81       |
| <i>Cyp51</i>                              | lanosterol 14 $\alpha$ -demethylase                                                                       | NM_020010.2        | Fw: ACGCTGCCTGGCTATTGC<br>Rv: TTGATCTCTCGATGGGCTCTATC    | 1.75       |
| <i>Tm7sf2</i>                             | transmembrane 7 superfamily member 2/sterol- $\Delta^{14}$ - reductase                                    | NM_028454.2        | Fw: GCCTCGGTTCCCTTTGACTT<br>Rv: ATCAGCAGGGCCAGGTTA       | 1.82       |
| <i>Sc4mol</i>                             | sterol-C4-methyl oxidase-like                                                                             | NM_025436.2        | Fw: CGGAATTGTGCTTTTGTGTG<br>Rv: GCGGGTTGAGAGGAATATCA     | 2.01       |
| <i>Nsdhl</i>                              | NAD(P) dependent steroid dehydrogenase-like /sterol-4 $\alpha$ -carboxylate 3-dehydrogenase               | NM_010941.3        | Fw: TGCAGCTCTAGGTGGAAAGG<br>Rv: GAACGTCCAGAAAGGGATTG     | 2.00       |
| <i>Hsd17b7</i>                            | hydroxysteroid (17 $\beta$ ) dehydrogenase 7                                                              | NM_010476.3        | Fw: GCTCACTGTGACACCGTACAA<br>Rv: CCGGTTTTTGGTGGAAGAG     | 1.94       |
| <i>Sc5d</i>                               | sterol-C5-desaturase/lathosterol oxidase                                                                  | NM_172769          | Fw: CCTTAATGAAACACCCACAGTTT<br>Rv: CTCCAGCAGGAACAGTGAGAC | 1.84       |
| <i>Ebp</i>                                | phenylalkylamine Ca <sup>2+</sup> antagonist (emopamil) binding protein/sterol- $\Delta^{8,7}$ -isomerase | NM_007898.2        | Fw: TGTCCTACAGCTTGTGGTGTCT<br>Rv: AATAAACGGGGTGGCCTATC   | 1.89       |
| <i>Dhcr7</i>                              | 7-dehydrocholesterol reductase                                                                            | NM_007856.2        | Fw: GCTTCAGGCAGGCACTTAGA<br>Rv: GGATTTTCGAAGCCATCAGG     | 1.85       |
| <i>Dhcr24</i>                             | 24-dehydrocholesterol reductase                                                                           | NM_053272.2        | Fw: GGTCATGACGGACGACGTA<br>Rv: AGGGCTTGTAGTAACTGCCAAT    | 1.91       |

Table S1. Cont.

| Gene symbol                             | Gene/enzyme description                                                  | NCBI accession no. | Primer sequence                                           | Efficiency |
|-----------------------------------------|--------------------------------------------------------------------------|--------------------|-----------------------------------------------------------|------------|
| <b><i>Cholesterol-related genes</i></b> |                                                                          |                    |                                                           |            |
| <i>Srebf2</i>                           | sterol regulatory element binding transcription factor 2                 | NM_033218.1        | Fw: GCGTTCTGGAGACCATGGA<br>Rv: ACAAAGTTGCTCTGAAAACAAATCA  | 1.62       |
| <i>Ldlr</i>                             | low density lipoprotein receptor                                         | NM_010700.3        | Fw: AGGCTGTGGGCTCCATAGG<br>Rv: TGCGGTCCAGGGTCATCT         | 1.79       |
| <i>Lxra</i>                             | nuclear receptor subfamily 1, group H, member 3 (Nr1h3)/liver X receptor | NM_013839.4        | Fw: ACTTCAGTTACAACCGGAAGA<br>Rv: GCTCTGGAGAACTCAAAGATGG   | 1.91       |
| <i>Cd36</i>                             | CD36 antigen                                                             | NM_001159558.1     | Fw: AAAACGACTGCAGGTCAACA<br>Rv: CATTCTGCTTTTTCATCACCA     | 2.00       |
| <i>Scarb1</i>                           | scavenger receptor class B, member 1                                     | NM_016741.2        | Fw: TCAGAAGCTGTCTTGGTCTGAAC<br>Rv: GTTCATGGGGATCCCAGTGA   | 1.77       |
| <i>Abcg5</i>                            | ATP-binding cassette subfamily G, member 5                               | NM_031884.1        | Fw: CTTACCCACGGTTCCTTTCA<br>Rv: ACGCATAATCACTGCCTGCT      | 1.72       |
| <i>Abcg8</i>                            | ATP-binding cassette subfamily G member 8                                | NM_026180.2        | Fw: AAGACGGGCTGTACTGCT<br>Rv: AGTAGATGGGCATCGCGTAG        | 2.00       |
| <b><i>Bile acid synthesis genes</i></b> |                                                                          |                    |                                                           |            |
| <i>Cyp7a1</i>                           | cholesterol 7-alpha-monooxygenase                                        | NM_007824.2        | Fw: CAGGGAGATGCTCTGTGTTC<br>Rv: AGGCATACATCCCTTCCGTGA     | 1.88       |
| <i>Cyp7b1</i>                           | 25-hydroxycholesterol 7-alpha-hydroxylase                                | NM_007825.4        | Fw: CCGATTCTGCCGTCTCCTT<br>Rv: GCAGCCTTACTCTGCAAAGCTT     | 1.82       |
| <i>Cyp8b1</i>                           | 7-alpha-hydroxycholesterol-4-en-3-one                                    | NM_010012.3        | Fw: AAGGCTGGCTTCCTGAGCTT<br>Rv: AACAGCTCATCGGCCTCATC      | 1.71       |
| <i>Cyp27a1</i>                          | sterol 26-hydroxylase                                                    | NM_024264.4        | Fw: CCTCACCTATGGGATCTTCATC<br>Rv: TTAAAGGCATCCGTGTAGAGC   | 1.90       |
| <b><i>Reference genes</i></b>           |                                                                          |                    |                                                           |            |
| <i>Utp6</i>                             | small subunit (SSU) processome component                                 | NM_144826.3        | Fw: TTTCGGTTGAGTTTTTCAGGA<br>Rv: CCCTCAGGTTTACCATCTTGC    | 1.82       |
| <i>Hmbs</i>                             | hydroxymethylbilane synthase                                             | NM_013551.2        | Fw: TCCCTGAAGGATGTGCCTA<br>Rv: AAGGGTTTTCCCGTTTGC         | 1.73       |
| <i>Ppib</i>                             | peptidylprolyl isomerase B                                               | NM_011149.2        | Fw: GGAGATGGCACAGGAGGAAA<br>Rv: CCGTAGTGCTTCAGTTTGAAGTTCT | 1.84       |

**Table S2.** Fold change (FC) differences of expression of cholesterologenic genes. Significant p values are bolded. HFC – high-fat diet with cholesterol, HFnC–high-fat diet without cholesterol

| Gene<br>symbol | HFC/HFnC             |              |         |              |       |              | Females/Males |              |       |         |
|----------------|----------------------|--------------|---------|--------------|-------|--------------|---------------|--------------|-------|---------|
|                | Females and<br>males |              | Females |              | Males |              | HFnC          |              | HFC   |         |
|                | FC                   | p value      | FC      | p value      | FC    | p value      | FC            | p value      | FC    | p value |
| <i>Hmgcs1</i>  | 0.105                | <b>0.015</b> | 0.098   | <b>0.003</b> | 0.120 | 0.164        | 2.257         | 0.053        | 1.837 | 0.87    |
| <i>Hmgcr</i>   | 0.160                | <b>0.002</b> | 0.160   | <b>0.003</b> | 0.159 | 0.075        | 1.806         | 0.087        | 1.822 | 0.789   |
| <i>Fdft1</i>   | 0.344                | <b>0.011</b> | 0.403   | <b>0.018</b> | 0.241 | 0.075        | 1.729         | 0.086        | 2.89  | 0.281   |
| <i>Sqle</i>    | 0.072                | <b>0.001</b> | 0.076   | <b>0.036</b> | 0.067 | <b>0.025</b> | 1.158         | 0.705        | 1.315 | 0.657   |
| <i>Lss</i>     | 0.245                | <b>0.002</b> | 0.244   | <b>0.002</b> | 0.247 | <b>0.018</b> | 1.432         | 0.158        | 1.413 | 0.744   |
| <i>Cyp51</i>   | 0.176                | <b>0.001</b> | 0.159   | <b>0.033</b> | 0.197 | <b>0.013</b> | 1.296         | 0.45         | 1.047 | 0.882   |
| <i>Tm7sf2</i>  | 0.318                | <b>0.001</b> | 0.39    | <b>0.026</b> | 0.241 | <b>0.012</b> | 1.077         | 0.796        | 1.745 | 0.534   |
| <i>Sc4mol</i>  | 0.062                | <b>0.014</b> | 0.06    | 0.075        | 0.065 | 0.055        | 2.295         | 0.216        | 2.139 | 0.500   |
| <i>Nsdhl</i>   | 0.100                | <b>0.005</b> | 0.104   | 0.067        | 0.095 | <b>0.014</b> | 1.819         | 0.276        | 2.004 | 0.616   |
| <i>Hsd17b7</i> | 0.223                | <b>0.001</b> | 0.219   | 0.055        | 0.229 | <b>0.003</b> | 1.505         | 0.306        | 1.439 | 0.442   |
| <i>Ebp</i>     | 0.308                | <b>0.012</b> | 0.266   | <b>0.001</b> | 0.406 | 0.176        | 2.356         | <b>0.004</b> | 1.541 | 0.620   |
| <i>Sc5d</i>    | 0.272                | 0.113        | 0.233   | 0.117        | 0.495 | 0.072        | 5.646         | 0.106        | 2.66  | 0.467   |
| <i>Dhcr7</i>   | 0.253                | <b>0.004</b> | 0.235   | <b>0.016</b> | 0.272 | <b>0.024</b> | 1.027         | 0.93         | 0.887 | 0.919   |
| <i>Dhcr24</i>  | 0.467                | <b>0.001</b> | 0.451   | <b>0.001</b> | 0.488 | <b>0.008</b> | 1.370         | <b>0.045</b> | 1.265 | 0.476   |

**Figure S1.** Gallbladder bile acid composition. Black columns represent male and white columns female mice. Error bars represent SEMs.  $\cdot p < 0.1$ ;  $* p < 0.05$ ;  $** p < 0.01$ ;  $*** p < 0.001$ .

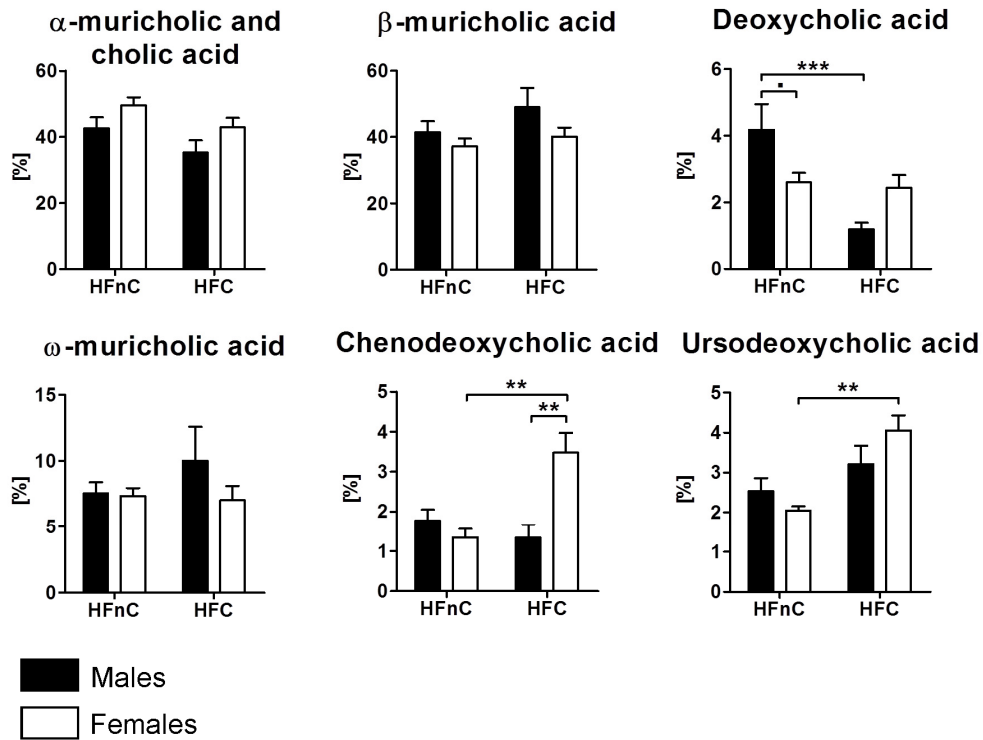

Supplement: molecules-18-11067-s001.pdf [file molecules-18-11067-s001.pdf]
